# Supplementary material for: Presymptomatic change in microRNAs modulates Tau pathology
Source: PubMed Central journal article supplement (PMC6006352; doi:10.1038/s41598-018-27527-6), 2018-06-18
Supplement: 41598_2018_27527_MOESM1_ESM.pdf [file 41598_2018_27527_MOESM1_ESM.pdf]

**Title: Presymptomatic change in microRNAs modulates Tau pathology**

**Authors and author affiliation:** Salil Sharma<sup>1</sup>, Ines Khadimallah<sup>2</sup>, Adam Williamson Corya<sup>1</sup>, Yousuf Omar Ali<sup>1</sup>, Xi Rao<sup>3</sup>, Yunlong Liu<sup>3</sup>, Hui-Chen Lu<sup>1,\*</sup>

<sup>1</sup>Department of Psychological and Brain Sciences, the Linda and Jack Gill Center for Bimolecular Sciences, Indiana University, Bloomington, IN 47405; <sup>2</sup>Department of Fundamental Neurosciences (DNF), University of Lausanne (UNIL), Lausanne, Switzerland; <sup>3</sup>Medical and Molecular Genetics, Indiana University School of Medicine, Indianapolis, Indiana 46202

**\* Corresponding Author and Address:**

Hui-Chen Lu, Ph.D.

Department of Psychological and Brain Sciences

Indiana University

1101 E. 10th Street

Bloomington, IN 47405

Tel: 812-856-4998

Fax: 812-856-7187

Email: [hclu@indiana.edu](mailto:hclu@indiana.edu)

# A

## 2m hippocampus

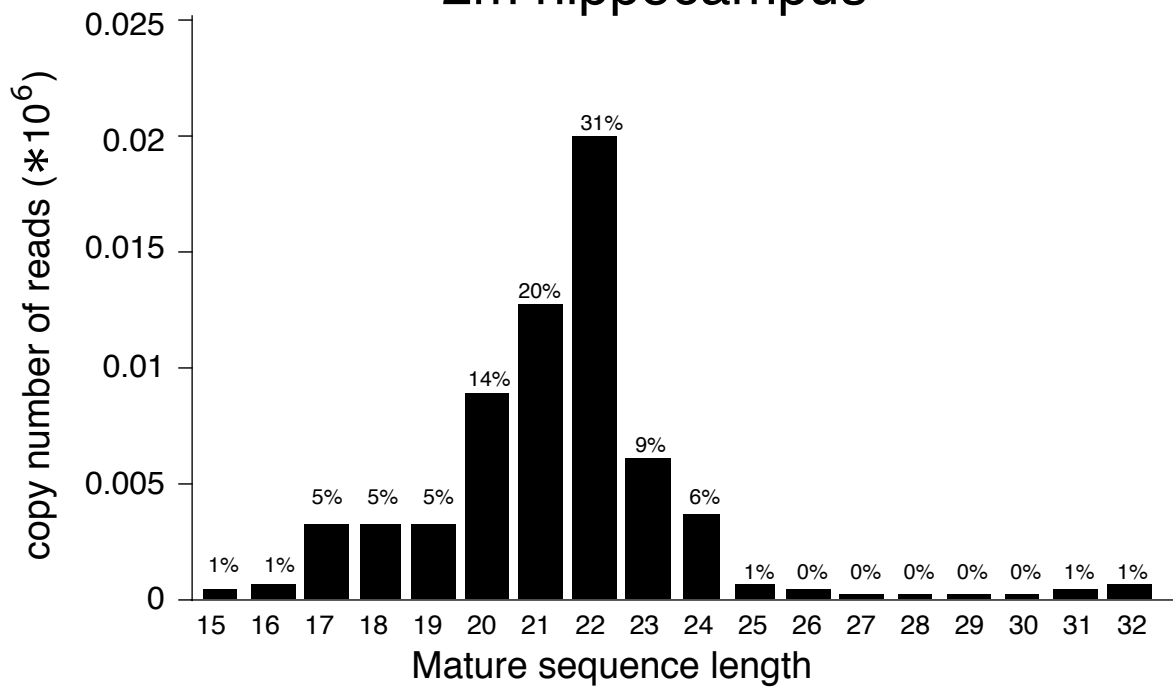

# B

## 6m hippocampus

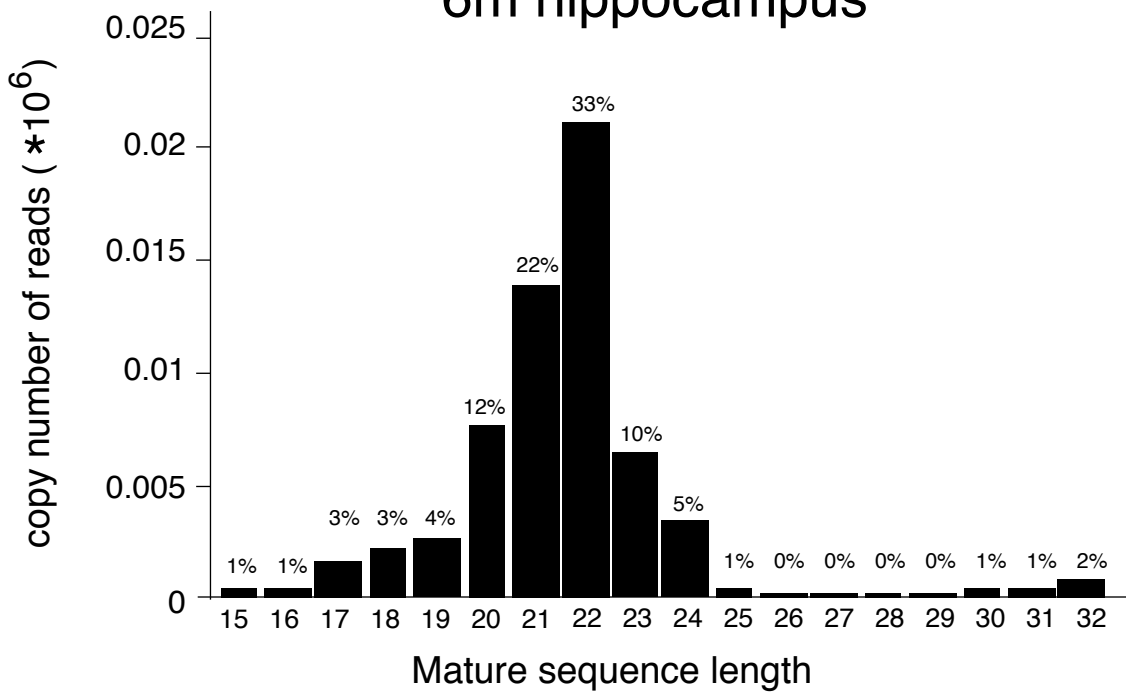

### MDS Plot

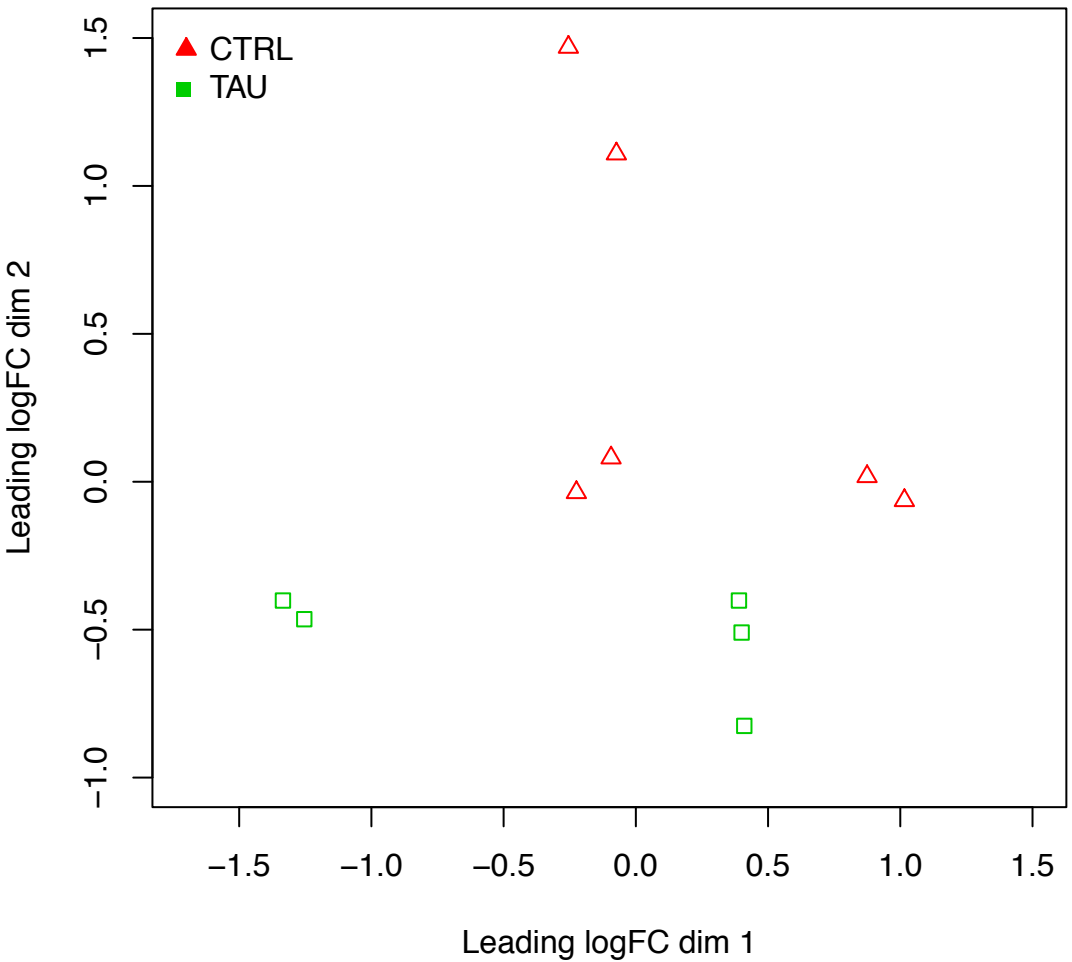

Supplementary Fig 3

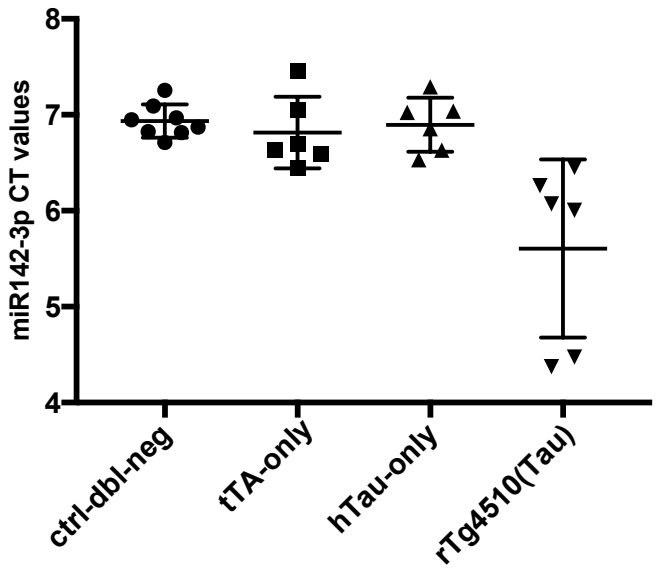

# Supplementary Fig 4

**A**

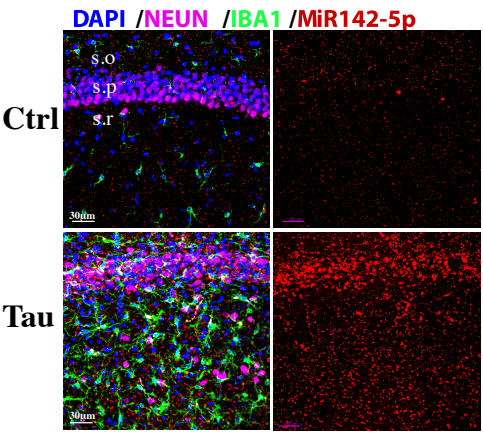

**B**

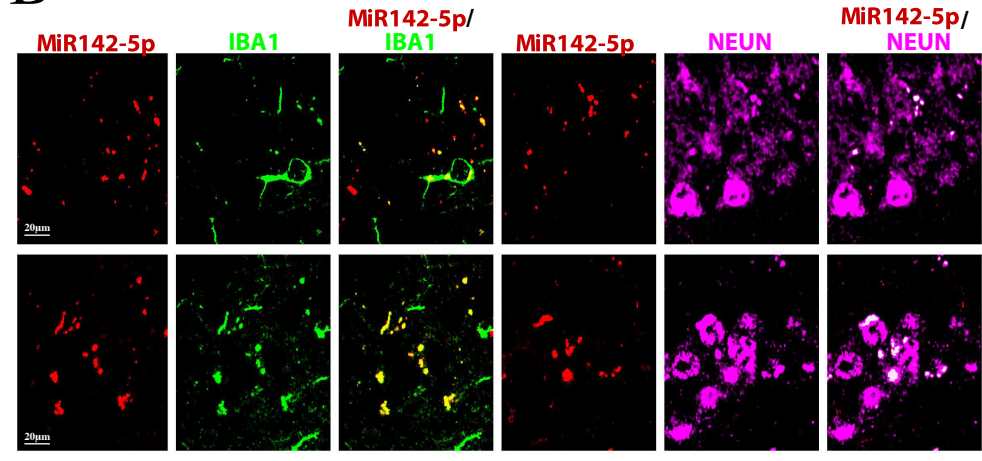

**C**

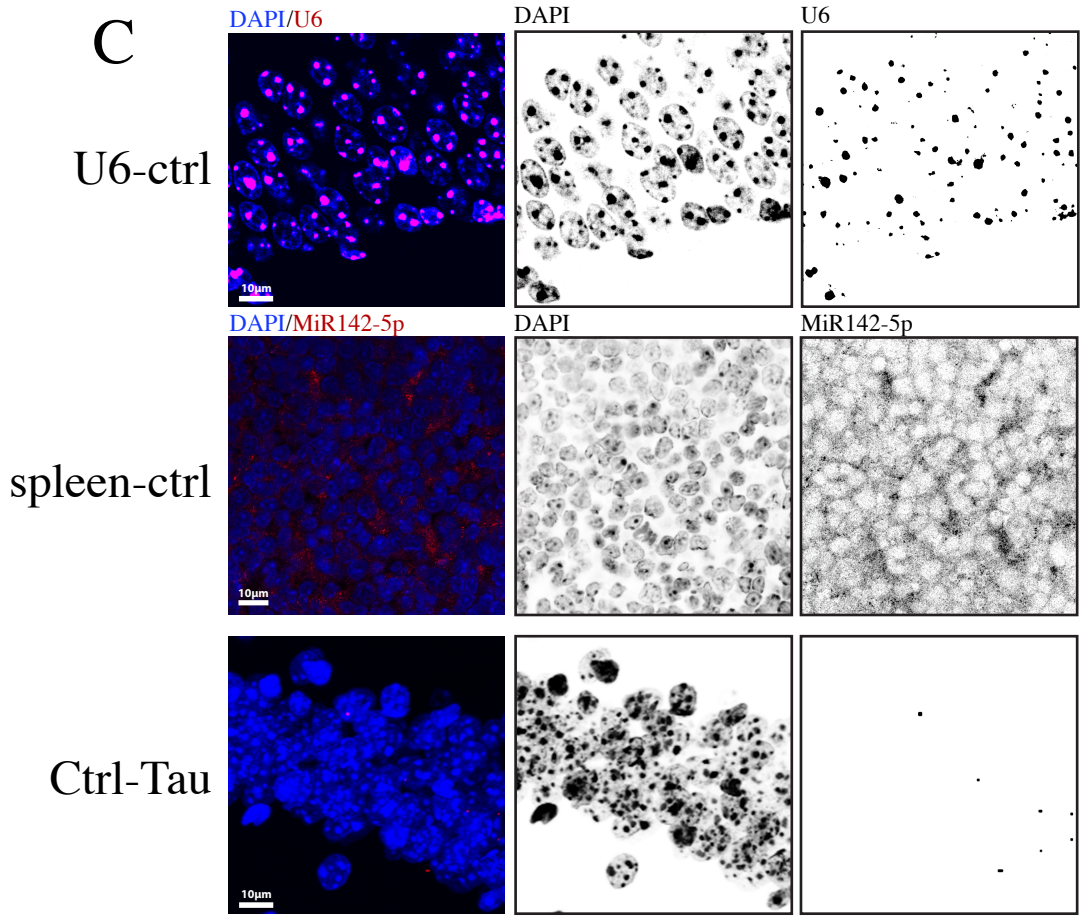

## MDS Plot

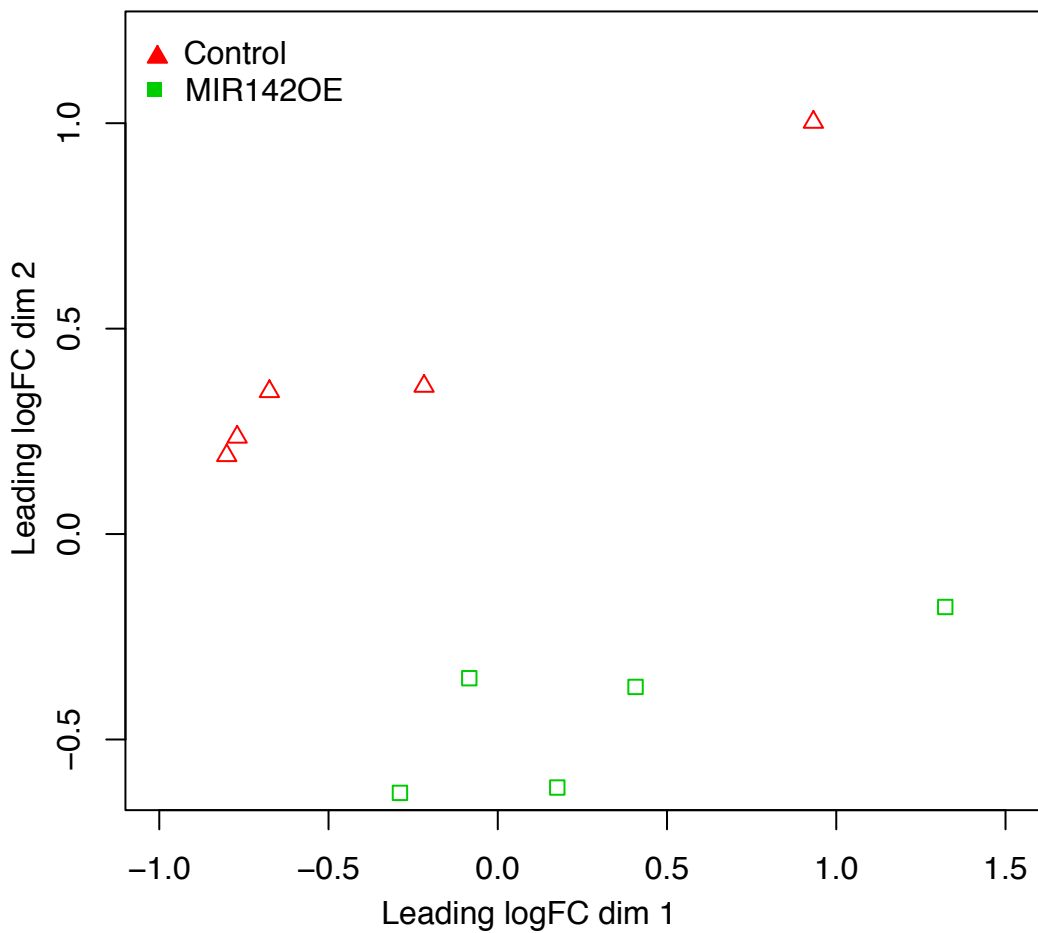

**Supplementary Table 1:** Hippocampus tissue information for RNA sequencing.

| <b>Age</b> | <b>Treatment</b> | <b>Tau</b> | <b>CAMKII<math>\alpha</math>-tTA</b> | <b>Sex</b> |
|------------|------------------|------------|--------------------------------------|------------|
| 2M         | Control1         | Negative   | Negative                             | F          |
|            | Control2         | Negative   | Negative                             | F          |
|            | Control3         | Negative   | Negative                             | F          |
|            | Tau1             | Positive   | Positive                             | F          |
|            | Tau2             | Positive   | Positive                             | F          |
|            | Tau3             | Positive   | Positive                             | F          |
| 6M         | Control1         | Negative   | Negative                             | M          |
|            | Control2         | Negative   | Negative                             | M          |
|            | Tau1             | Positive   | Positive                             | M          |
|            | Tau2             | Positive   | Positive                             | M          |
|            | Tau3             | Positive   | Positive                             | M          |
|            | Tau4             | Positive   | Positive                             | M          |

**Supplementary Table 2. Differentially regulated microRNAs at 2 months**

| #                                                   | Accession ID | miR Name                    | Ctrl-reads (mean) | Tau-reads (mean) | p-value |
|-----------------------------------------------------|--------------|-----------------------------|-------------------|------------------|---------|
| Reads greater than or equal to average reads (7059) |              |                             |                   |                  |         |
| 1                                                   | MIMAT0000590 | mmu-miR-342-3p              | 17222.9250        | 10925.3850       | 0.0030  |
| 2                                                   | MIMAT0000383 | mmu-let-7d-5p               | 61842.8080        | 47847.7240       | 0.0070  |
| 3                                                   | MIMAT0000163 | mmu-miR-153-3p              | 16263.8970        | 7721.4640        | 0.0110  |
| 4                                                   | MIMAT0000133 | mmu-miR-101a-3p_R+1_1ss21AC | 13774.8440        | 22129.2610       | 0.0130  |
| 5                                                   | MIMAT0003127 | mmu-miR-484                 | 14264.9740        | 9327.4350        | 0.0140  |
| 6                                                   | MIMAT0000673 | mmu-miR-181b-5p             | 7049.9250         | 11664.6270       | 0.0140  |
| 7                                                   | MIMAT0000137 | mmu-miR-126a-5p             | 14978.4730        | 21055.9010       | 0.0140  |
| 8                                                   | MIMAT0003151 | mmu-miR-378a-3p_R+1         | 12119.2510        | 8760.6190        | 0.0190  |
| 9                                                   | MIMAT0000248 | mmu-miR-30e-5p_R+2          | 118424.9560       | 157705.2710      | 0.0200  |
| 10                                                  | MIMAT0004746 | mmu-miR-409-5p              | 21452.2360        | 9797.0180        | 0.0240  |
| 11                                                  | MIMAT0000674 | mmu-miR-181c-5p             | 7346.0270         | 9209.5900        | 0.0300  |
| 12                                                  | MIMAT0000125 | mmu-miR-23b-3p_R+3          | 6219.5360         | 11582.2720       | 0.0300  |
| 13                                                  | MIMAT0000210 | mmu-miR-181a-5p             | 40005.2330        | 76645.8140       | 0.0300  |
| 14                                                  | MIMAT0000537 | mmu-miR-27a-3p              | 10046.1920        | 15952.9280       | 0.0380  |
| 15                                                  | MIMAT0000677 | mmu-miR-7a-5p_R+1           | 19582.2740        | 7051.2790        | 0.0410  |
| 16                                                  | MIMAT0000534 | mmu-miR-26b-5p_R+1          | 22185.9100        | 26712.9250       | 0.0420  |
| 17                                                  | MIMAT0000159 | mmu-miR-149-5p              | 8732.0630         | 6628.4330        | 0.0430  |
| 18                                                  | MIMAT0000138 | mmu-miR-126a-3p_R-1         | 39121.6730        | 50870.8800       | 0.0440  |
| 19                                                  | MIMAT0000515 | mmu-miR-30d-5p_R-2          | 98229.8670        | 129900.8150      | 0.0440  |
| 20                                                  | MIMAT0000546 | mmu-miR-103-3p              | 14693.1980        | 11201.2170       | 0.0450  |
| 21                                                  | MIMAT0000678 | mmu-miR-7b-5p_R+1           | 10355.1020        | 5403.6650        | 0.0480  |
| 22                                                  | MIMAT0022841 | mmu-miR-219a-2-3p           | 5110.6020         | 10046.7080       | 0.0490  |
| Reads less than average reads (7059)                |              |                             |                   |                  |         |
| 1                                                   | MIMAT0000571 | mmu-miR-331-3p_R+1          | 1880.3688         | 1677.8590        | 0.0002  |
| 2                                                   | MIMAT0004624 | mmu-miR-15a-3p_1ss22AT      | 64.5124           | 106.6957         | 0.0003  |
| 3                                                   | MIMAT0014808 | mmu-miR-344d-3p             | 426.8822          | 247.6720         | 0.0009  |
| 4                                                   | MIMAT0019349 | mmu-miR-101c_L+1R+2         | 1001.2743         | 1763.5193        | 0.0023  |
| 5                                                   | MIMAT0004826 | mmu-miR-146b-3p             | 38.6537           | 57.6857          | 0.0040  |
| 6                                                   | MIMAT0017018 | mmu-miR-16-2-3p_R-1         | 26.3185           | 42.4596          | 0.0042  |
| 7                                                   | MIMAT0016997 | mmu-miR-187-5p              | 270.8221          | 59.9853          | 0.0043  |
| 8                                                   | MIMAT0005291 | mmu-miR-582-5p              | 1897.3794         | 3285.7356        | 0.0044  |
| 9                                                   | MIMAT0017040 | mmu-miR-350-5p_R+2          | 42.6725           | 95.2445          | 0.0049  |
| 10                                                  | MIMAT0005292 | mmu-miR-582-3p_L-1R+2       | 776.1475          | 1397.9157        | 0.0058  |
| 11                                                  | MIMAT0003730 | mmu-miR-592-5p_L-1          | 458.5517          | 686.8648         | 0.0059  |
| 12                                                  | MIMAT0014823 | mmu-miR-3057-3p             | 21.5805           | 11.6656          | 0.0064  |
| 13                                                  | MIMAT0006942 | oan-miR-103-3p_R+1          | 59.5052           | 38.6641          | 0.0066  |
| 14                                                  | MIMAT0017068 | mmu-miR-181c-3p             | 1132.1045         | 1571.3509        | 0.0070  |



|    |              |                            |           |           |        |
|----|--------------|----------------------------|-----------|-----------|--------|
| 15 | MIMAT0001094 | mmu-miR-412-3p_L+1         | 58.4771   | 32.4741   | 0.0079 |
| 16 | MIMAT0003735 | mmu-miR-672-5p             | 572.7475  | 320.9741  | 0.0081 |
| 17 | MIMAT0003711 | mmu-miR-652-3p_R+1         | 5872.0751 | 2566.8260 | 0.0102 |
| 18 | MIMAT0004684 | mmu-miR-362-3p_1ss22AT     | 272.8543  | 337.9687  | 0.0102 |
| 19 | MIMAT0003507 | mmu-miR-500-3p_R-1         | 387.9997  | 297.3728  | 0.0110 |
| 20 | MIMAT0000216 | mmu-miR-187-3p_R+1         | 3112.5654 | 683.4170  | 0.0113 |
| 21 | MIMAT0017209 | mmu-miR-541-3p             | 317.3998  | 100.0163  | 0.0122 |
| 22 | MIMAT0000209 | mmu-miR-129-5p             | 2494.5915 | 2094.7373 | 0.0124 |
| 23 | MIMAT0000711 | mmu-miR-365-3p             | 1577.8789 | 994.9661  | 0.0126 |
| 24 | MIMAT0000152 | mmu-miR-140-3p_L-1R+2      | 4802.0084 | 5788.5101 | 0.0127 |
| 25 | MIMAT0005792 | hsa-miR-320b_2ss20CA22AT   | 47.0132   | 27.9594   | 0.0136 |
| 26 | MIMAT0003898 | mmu-miR-760-3p_R+2         | 747.3670  | 331.1073  | 0.0139 |
| 27 | MIMAT0019339 | mmu-miR-28c_L+1            | 359.5167  | 269.7986  | 0.0139 |
| 28 | MIMAT0010560 | mmu-miR-1249-3p            | 1133.8087 | 1931.7656 | 0.0141 |
| 29 | MIMAT0005859 | mmu-miR-1198-5p            | 754.4421  | 550.4306  | 0.0142 |
| 30 | MIMAT0000666 | mmu-miR-320-3p             | 3914.0798 | 2634.4592 | 0.0161 |
| 31 | MIMAT0027807 | mmu-miR-6953-3p_R-1        | 13.2084   | 7.2927    | 0.0165 |
| 32 | MIMAT0003894 | mmu-miR-764-5p_R+3         | 46.7483   | 17.3068   | 0.0167 |
| 33 | MIMAT0036137 | chi-miR-326-5p_1ss5GA      | 25.4076   | 43.8821   | 0.0170 |
| 34 | MIMAT0017017 | mmu-let-7f-2-3p_R+1        | 230.4440  | 291.2281  | 0.0178 |
| 35 | MIMAT0035718 | mmu-miR-935_L-2            | 162.3808  | 127.1211  | 0.0185 |
| 36 | MIMAT0025585 | mmu-miR-6540-5p_R-1        | 438.9607  | 273.1388  | 0.0187 |
| 37 | MIMAT0016992 | mmu-miR-153-5p_L+5         | 576.2505  | 366.5502  | 0.0188 |
| 38 | MIMAT0000584 | mmu-miR-339-5p_R-2_1ss21AT | 383.3649  | 517.9357  | 0.0188 |
| 39 | MIMAT0014926 | mmu-miR-344b-3p            | 567.2167  | 276.0596  | 0.0192 |
| 40 | MIMAT0004528 | mmu-miR-125a-3p_R-1        | 374.1257  | 262.7612  | 0.0195 |
| 41 | MIMAT0003490 | mmu-miR-700-3p             | 202.7094  | 125.7502  | 0.0196 |
| 42 | MIMAT0000532 | mmu-miR-23a-3p             | 3139.2190 | 5254.2089 | 0.0201 |
| 43 | MIMAT0000233 | mmu-miR-200b-3p            | 4202.5302 | 230.5671  | 0.0201 |
| 44 | MIMAT0005851 | mmu-miR-1193-3p            | 713.8030  | 433.9682  | 0.0205 |
| 45 | MIMAT0000664 | mmu-miR-219a-5p            | 1745.0204 | 3593.1071 | 0.0205 |
| 46 | MIMAT0017070 | mmu-miR-7a-2-3p            | 204.9704  | 86.4919   | 0.0209 |
| 47 | MIMAT0014810 | mmu-miR-1298-3p            | 1099.4219 | 424.2450  | 0.0210 |
| 48 | MIMAT0024360 | ppy-miR-378d_R+3           | 139.3350  | 74.4526   | 0.0211 |
| 49 | MIMAT0000597 | mmu-miR-346-5p             | 6759.8102 | 1540.1083 | 0.0212 |
| 50 | MIMAT0014934 | mmu-miR-3102-5p.2-5p_R-1   | 59.8325   | 27.0112   | 0.0213 |
| 51 | MIMAT0004529 | mmu-miR-125b-2-3p_R-1      | 4077.9593 | 5641.1494 | 0.0219 |
| 52 | MIMAT0000660 | mmu-miR-181a-1-3p          | 1343.2453 | 2708.9901 | 0.0219 |
| 53 | MIMAT0004120 | mdu-miR-187-3p_R+1         | 43.0333   | 10.1009   | 0.0225 |
| 54 | MIMAT0014803 | mmu-miR-1264-3p            | 2957.6974 | 587.0522  | 0.0226 |
| 55 | MIMAT0004653 | mmu-miR-342-5p_R-1         | 443.7011  | 316.8661  | 0.0234 |

|    |              |                               |           |           |        |
|----|--------------|-------------------------------|-----------|-----------|--------|
| 56 | MIMAT0014802 | mmu-miR-1264-5p               | 259.9885  | 86.5706   | 0.0238 |
| 57 | MIMAT0014877 | mmu-miR-3084-3p               | 27.3678   | 44.0977   | 0.0246 |
| 58 | MIMAT0003780 | mmu-miR-490-3p_R+1            | 1603.9012 | 2775.1617 | 0.0253 |
| 59 | MIMAT0006835 | oan-miR-181b-5p_R+7           | 27.9923   | 35.7060   | 0.0254 |
| 60 | MIMAT0003167 | mmu-miR-540-3p_R+2            | 515.7789  | 449.2134  | 0.0258 |
| 61 | MIMAT0014928 | mmu-miR-344c-3p               | 121.3344  | 56.6446   | 0.0260 |
| 62 | MIMAT0004621 | mmu-let-7b-3p_1ss22CT         | 818.7214  | 1038.1058 | 0.0262 |
| 63 |              | PC-5p-35674_14                | 7.5830    | 2.4778    | 0.0274 |
| 64 | MIMAT0004889 | mmu-miR-504-5p                | 128.7450  | 93.1411   | 0.0274 |
| 65 | MIMAT0000593 | mmu-miR-344-3p                | 866.3791  | 431.4883  | 0.0275 |
| 66 | MIMAT0000236 | mmu-miR-203-3p_L-1R+1         | 519.5805  | 946.8774  | 0.0278 |
| 67 | MIMAT0004662 | mmu-miR-139-3p_R+1            | 1749.5880 | 872.5954  | 0.0279 |
| 68 | MIMAT0000154 | mmu-miR-142a-5p_L+2R-3        | 2607.2628 | 3985.0584 | 0.0284 |
| 69 | MIMAT0004821 | mmu-miR-671-3p                | 618.7329  | 1008.5249 | 0.0289 |
| 70 | MIMAT0017328 | mmu-miR-1188-3p_R-2           | 10.5112   | 3.4010    | 0.0307 |
| 71 | MIMAT0025123 | mmu-let-7j_R-1_1ss8TG         | 4463.6111 | 3500.0757 | 0.0309 |
| 72 | MIMAT0017075 | mmu-miR-361-3p_L-1            | 1440.5507 | 1775.9864 | 0.0311 |
| 73 | MIMAT0005440 | mmu-miR-24-2-5p               | 1586.8049 | 2700.3089 | 0.0321 |
| 74 | MIMAT0009457 | mmu-miR-1839-3p_R-2           | 270.6956  | 380.3431  | 0.0332 |
| 75 | MIMAT0017060 | mmu-miR-221-5p                | 2599.4072 | 1688.9570 | 0.0339 |
| 76 |              | mmu-mir-149-p3                | 7.5971    | 15.3336   | 0.0341 |
| 77 | MIMAT0001537 | mmu-miR-429-3p                | 1058.8594 | 87.7023   | 0.0345 |
| 78 | MIMAT0000706 | mmu-miR-362-5p                | 707.6584  | 281.3269  | 0.0348 |
| 79 | MIMAT0000540 | mmu-miR-93-5p_R-2             | 1263.0649 | 1792.8912 | 0.0351 |
| 80 | MIMAT0000526 | mmu-miR-15a-5p_R-1            | 664.8703  | 1027.6883 | 0.0353 |
| 81 | MIMAT0016916 | hsa-miR-4286_R+1              | 5.7932    | 11.6903   | 0.0354 |
| 82 | MIMAT0004629 | mmu-miR-22-5p_R-1             | 341.1291  | 502.3946  | 0.0371 |
| 83 | MIMAT0003509 | mmu-miR-501-3p_R+1            | 1801.6016 | 766.7501  | 0.0388 |
| 84 | MIMAT0000155 | mmu-miR-142a-3p_R-1           | 124.0647  | 194.0203  | 0.0392 |
| 85 | MIMAT0004644 | mmu-miR-337-5p                | 2690.6416 | 2158.3830 | 0.0408 |
| 86 | MIMAT0022370 | mmu-miR-5621-3p               | 74.2179   | 43.9856   | 0.0414 |
| 87 | MIMAT0003734 | mmu-miR-667-3p                | 2029.4411 | 1421.8106 | 0.0420 |
| 88 | MIMAT0014944 | mmu-miR-486b-3p_R+1           | 25.9110   | 15.3719   | 0.0421 |
| 89 | MIMAT0004656 | mmu-miR-345-3p_L+1R-1_1ss22AT | 483.7142  | 328.6830  | 0.0432 |
| 90 | MIMAT0022384 | mmu-miR-344h-3p               | 8.4994    | 2.8570    | 0.0438 |
| 91 | MIMAT0023746 | cgr-miR-1260_R+3              | 102.8034  | 174.8222  | 0.0446 |
| 92 | MIMAT0000612 | mmu-miR-135b-5p               | 514.4915  | 293.0913  | 0.0451 |
| 93 | MIMAT0000519 | mmu-miR-200a-3p               | 6293.9471 | 442.8763  | 0.0458 |
| 94 | MIMAT0017069 | mmu-miR-128-2-5p              | 334.8365  | 191.1010  | 0.0467 |
| 95 | MIMAT0017282 | mmu-miR-544-5p                | 957.8717  | 623.3711  | 0.0480 |
| 96 | MIMAT0017067 | mmu-miR-181b-1-3p_R+2         | 69.8928   | 133.0907  | 0.0484 |

|    |              |                |           |           |        |
|----|--------------|----------------|-----------|-----------|--------|
| 97 | MIMAT0000160 | mmu-miR-150-5p | 4439.6832 | 6448.1987 | 0.0485 |
| 98 | MIMAT0004820 | mmu-miR-744-3p | 155.2825  | 262.7418  | 0.0486 |

**Supplementary Table 3. Differentially regulated microRNAs at 6 months**

| #                                                   | Accession ID            | Name         | Ctrl-reads (mean) | Tau-reads (mean) | p-value |
|-----------------------------------------------------|-------------------------|--------------|-------------------|------------------|---------|
| Reads greater than or equal to average reads (7616) |                         |              |                   |                  |         |
| 1                                                   | mmu-miR-221-3p          | MIMAT0000669 | 20697.0118        | 7951.0457        | 0.0058  |
| 2                                                   | mmu-miR-143-3p_R+1      | MIMAT0000247 | 140672.4247       | 92946.7573       | 0.0088  |
| 3                                                   | mmu-miR-338-3p_R-1      | MIMAT0000582 | 11771.9859        | 22578.0830       | 0.0112  |
| 4                                                   | mmu-miR-219a-2-3p       | MIMAT0022841 | 5764.2987         | 9115.6537        | 0.0131  |
| 5                                                   | mmu-miR-221-5p_R-4      | MIMAT0017060 | 7648.3178         | 1828.4888        | 0.0167  |
| 6                                                   | mmu-miR-103-3p          | MIMAT0000546 | 15123.6637        | 9885.3936        | 0.0210  |
| 7                                                   | mmu-miR-744-5p_R-1      | MIMAT0004187 | 13593.5815        | 7321.5200        | 0.0224  |
| 8                                                   | mmu-miR-26b-5p_R+1      | MIMAT0000534 | 22637.1354        | 30484.1688       | 0.0272  |
| 9                                                   | mmu-miR-222-3p_R+2      | MIMAT0000670 | 22167.7190        | 8430.5095        | 0.0316  |
| 10                                                  | mmu-miR-26a-5p          | MIMAT0000533 | 513205.9107       | 428165.3741      | 0.0323  |
| 11                                                  | mmu-let-7d-5p           | MIMAT0000383 | 81525.0144        | 50892.8572       | 0.0402  |
| 12                                                  | mmu-miR-9-5p            | MIMAT0000142 | 88155.5092        | 59575.7830       | 0.0405  |
| 13                                                  | mmu-miR-378a-3p_R+1     | MIMAT0003151 | 16043.4259        | 8933.7047        | 0.0443  |
| 14                                                  | mmu-miR-330-3p_L-1      | MIMAT0000569 | 7623.2540         | 3729.2710        | 0.0490  |
| Reads less than average reads (7616)                |                         |              |                   |                  |         |
| 1                                                   | mmu-miR-107-3p_R-1      | MIMAT0000647 | 2906.1178         | 2349.9838        | 0.0018  |
| 2                                                   | mmu-miR-664-3p_R-1      | MIMAT0012774 | 1761.7548         | 1448.2006        | 0.0024  |
| 3                                                   | mmu-miR-155-5p          | MIMAT0000165 | 15.6553           | 89.1600          | 0.0039  |
| 4                                                   | mmu-miR-8114            | MIMAT0031420 | 25.4082           | 47.9355          | 0.0042  |
| 5                                                   | mmu-miR-142a-5p_L+2R-3  | MIMAT0000154 | 3604.1938         | 6352.3171        | 0.0052  |
| 6                                                   | mmu-miR-216b-5p         | MIMAT0003729 | 3.9138            | 15.9094          | 0.0055  |
| 7                                                   | mmu-miR-181b-1-3p_R+2   | MIMAT0017067 | 81.2203           | 103.0799         | 0.0057  |
| 8                                                   | mmu-miR-7021-5p_L+2R-2  | MIMAT0027946 | 10.3621           | 5.1722           | 0.0059  |
| 9                                                   | cgr-miR-1260_R+2        | MIMAT0023746 | 130.0382          | 214.9477         | 0.0065  |
| 10                                                  | mmu-miR-125b-1-3p       | MIMAT0004669 | 1433.0540         | 2253.7315        | 0.0067  |
| 11                                                  | mmu-miR-7047-3p         | MIMAT0027999 | 52.3078           | 37.0068          | 0.0077  |
| 12                                                  | mmu-miR-130b-3p         | MIMAT0000387 | 27.2286           | 49.1028          | 0.0080  |
| 13                                                  | mmu-miR-141-3p_R-1      | MIMAT0000153 | 10.2573           | 75.7050          | 0.0080  |
| 14                                                  | PC-3p-26288_26          |              | 2.1494            | 8.8522           | 0.0090  |
| 15                                                  | mmu-miR-7235-3p_R-1     | MIMAT0028439 | 19.6812           | 11.5262          | 0.0092  |
| 16                                                  | mmu-miR-181a-1-3p       | MIMAT0000660 | 1993.9888         | 2240.8242        | 0.0093  |
| 17                                                  | mmu-miR-669o-3p_R-1     | MIMAT0017347 | 9.5920            | 12.8881          | 0.0097  |
| 18                                                  | PC-5p-7215_175          |              | 24.8939           | 79.1250          | 0.0111  |
| 19                                                  | mmu-miR-7226-3p_R-2     | MIMAT0028421 | 3.9138            | 8.8405           | 0.0116  |
| 20                                                  | rno-miR-1843b-3p_1ss3TC | MIMAT0035731 | 350.6473          | 272.0225         | 0.0116  |
| 21                                                  | mmu-miR-25-5p_R+1       | MIMAT0017049 | 31.1985           | 20.0083          | 0.0120  |
| 22                                                  | mmu-miR-29b-2-5p_R-2    | MIMAT0017063 | 143.1201          | 105.6110         | 0.0133  |

|    |                             |              |           |           |        |
|----|-----------------------------|--------------|-----------|-----------|--------|
| 23 | mmu-miR-124-5p              | MIMAT0004527 | 155.9453  | 107.9933  | 0.0147 |
| 24 | PC-3p-23856_30              |              | 19.5691   | 27.9148   | 0.0160 |
| 25 | mmu-miR-6540-3p             | MIMAT0025586 | 4.7960    | 13.0985   | 0.0169 |
| 26 | mmu-miR-15a-3p_1ss22AT      | MIMAT0004624 | 68.4602   | 105.0508  | 0.0184 |
| 27 | mmu-mir-16-1-p3             |              | 93.8195   | 124.6812  | 0.0192 |
| 28 | ptr-miR-92_R+2              | MIMAT0002699 | 803.6286  | 992.8661  | 0.0204 |
| 29 | ssc-mir-4335-p5             |              | 105.0150  | 139.7552  | 0.0208 |
| 30 | mmu-miR-671-3p              | MIMAT0004821 | 924.0569  | 692.3528  | 0.0217 |
| 31 | tch-mir-9771b-p5_1ss14CG    |              | 28.0352   | 14.3503   | 0.0226 |
| 32 | mmu-miR-676-5p              | MIMAT0003781 | 133.7766  | 117.8463  | 0.0236 |
| 33 | mmu-miR-1843b-5p_L+1R-1     | MIMAT0019345 | 5617.6345 | 4353.0472 | 0.0237 |
| 34 | hsa-miR-4792_L+1R+2_1ss10GT | MIMAT0019964 | 5.2931    | 30.7330   | 0.0248 |
| 35 | mmu-miR-362-3p_1ss22AT      | MIMAT0004684 | 304.3179  | 386.2450  | 0.0251 |
| 36 | mmu-miR-188-3p              | MIMAT0004541 | 27.0117   | 52.6916   | 0.0259 |
| 37 | mmu-miR-337-3p_L+1R-2       | MIMAT0000578 | 251.5418  | 602.0004  | 0.0263 |
| 38 | mdo-miR-150-5p_1ss21AT      | MIMAT0012748 | 726.8891  | 981.7618  | 0.0281 |
| 39 | mmu-miR-21a-3p_R-1          | MIMAT0004628 | 53.0146   | 114.2543  | 0.0282 |
| 40 | mmu-miR-411-3p_R-1          | MIMAT0001093 | 410.0126  | 466.9449  | 0.0287 |
| 41 | efu-mir-9277-p3_2ss17AC18GA |              | 206.6134  | 345.0022  | 0.0299 |
| 42 | mmu-miR-202-5p              | MIMAT0004546 | 6.1753    | 14.9102   | 0.0300 |
| 43 | mmu-miR-1191b-5p            | MIMAT0029866 | 4.6839    | 10.8738   | 0.0315 |
| 44 | mmu-miR-195a-5p             | MIMAT0000225 | 4275.6671 | 2764.2947 | 0.0320 |
| 45 | mmu-miR-328-3p              | MIMAT0000565 | 6894.2386 | 5161.2803 | 0.0321 |
| 46 | mmu-miR-193a-3p             | MIMAT0000223 | 7.5547    | 23.6816   | 0.0330 |
| 47 | mdo-mir-7311-p5_1ss8CG      |              | 10.6351   | 26.3714   | 0.0341 |
| 48 | mmu-miR-219a-5p             | MIMAT0000664 | 1856.5034 | 4047.0971 | 0.0348 |
| 49 | mmu-miR-7044-3p             | MIMAT0027993 | 15.7041   | 5.8071    | 0.0350 |
| 50 | mmu-miR-28c_L+1R+1          | MIMAT0019339 | 37.5045   | 28.8722   | 0.0366 |
| 51 | oan-miR-1386_L-1R-1         | MIMAT0007162 | 19.8421   | 34.5650   | 0.0368 |
| 52 | mmu-miR-30c-1-3p            | MIMAT0004616 | 164.9091  | 137.7552  | 0.0370 |
| 53 | mmu-miR-182-3p_L-1          | MIMAT0016995 | 1.7644    | 6.6716    | 0.0372 |
| 54 | mmu-miR-216a-5p             | MIMAT0000662 | 30.7990   | 110.6161  | 0.0397 |
| 55 | mmu-miR-1839-5p             | MIMAT0009456 | 3565.2743 | 2244.8241 | 0.0397 |
| 56 | PC-3p-6216_220              |              | 11.3076   | 67.6414   | 0.0405 |
| 57 | mmu-miR-676-3p              | MIMAT0003782 | 2038.1113 | 1454.7540 | 0.0415 |
| 58 | mmu-miR-7a-1-3p             | MIMAT0004670 | 626.8949  | 479.2330  | 0.0415 |
| 59 | mmu-miR-93-5p_R-2           | MIMAT0000540 | 1422.9805 | 2062.6838 | 0.0423 |
| 60 | mmu-miR-504-5p              | MIMAT0004889 | 206.0330  | 113.5930  | 0.0429 |
| 61 | mmu-miR-150-5p_R-1          | MIMAT0000160 | 3439.2879 | 6305.0996 | 0.0439 |

|    |                             |              |           |           |        |
|----|-----------------------------|--------------|-----------|-----------|--------|
| 62 | chi-miR-30a-3p_L-1R+2       | MIMAT0036122 | 17.5317   | 27.4896   | 0.0439 |
| 63 | miR-1249-3p                 | MIMAT0010560 | 1807.8838 | 2515.4197 | 0.0445 |
| 64 | mmu-miR-5129-5p_R-1_1ss12TC | MIMAT0020640 | 14.2271   | 4.0839    | 0.0446 |
| 65 | mmu-miR-142a-3p_R-1         | MIMAT0000155 | 137.5440  | 303.5018  | 0.0447 |
| 66 | mmu-miR-139-3p_R+1          | MIMAT0004662 | 1100.7157 | 678.1925  | 0.0448 |
| 67 | efu-mir-127-p5_1ss11CG      |              | 5.6782    | 8.6156    | 0.0452 |
| 68 | rno-mir-6320-p3_1ss15AC     |              | 98.9373   | 44.4195   | 0.0454 |
| 69 | mmu-miR-344d-3-5p           | MIMAT0014807 | 352.5488  | 126.0435  | 0.0460 |
| 70 | mmu-miR-153-5p_L+5          | MIMAT0016992 | 439.8190  | 337.1094  | 0.0461 |
| 71 | mmu-miR-195a-3p             | MIMAT0017000 | 89.5207   | 59.8487   | 0.0465 |
| 72 | mmu-miR-450a-5p             | MIMAT0001546 | 489.0501  | 373.8491  | 0.0466 |
| 73 | mmu-miR-351-5p_R-1          | MIMAT0000609 | 1900.5414 | 1269.7919 | 0.0468 |
| 74 | mmu-miR-412-3p_L+1          | MIMAT0001094 | 49.7733   | 28.1056   | 0.0470 |
| 75 | mmu-miR-551b-5p             | MIMAT0017236 | 67.6557   | 34.6577   | 0.0476 |
| 76 | mmu-miR-1843a-3p_R-1        | MIMAT0014806 | 132.8384  | 119.0427  | 0.0481 |
| 77 | PC-3p-12459_77              |              | 11.6294   | 18.0646   | 0.0486 |
| 78 | mmu-miR-299b-3p_R+4         | MIMAT0022837 | 163.5641  | 140.8624  | 0.0499 |

**Supplementary Fig 1:** Read distribution of small RNA sequencing of (A) 2m and (B) 6m Tau hippocampi.

**Supplementary Fig 2:** The multi-dimensional scaling (MDS) plot shows differences among 2m control and Tau hippocampi.

**Supplementary Fig 3:** Relative miR142-3p expression levels in control double negative, tTA only, hTau only and rTg4510 (Tau) 2m hippocampi.

**Supplementary Fig 4:** (A,B) Dual ISH and IHC staining of (A) miR142-5p (red) in microglia (green) and neurons (magenta) in the brain of 6m old Tau mice. MiR142-5p was more abundant in 6m Tau hippocampi compared to control. Strong miR142-5p signals could be detected in both NeuN<sup>+</sup> neurons and Iba-1<sup>+</sup> microglia in Tau hippocampi CA1 area. (C) The specificity of this experiment was verified with two positive controls: U6, a noncoding snRNA, was used as a positive control for all tissues because it is present in most cell types while spleen was used as the positive control for its high levels of miR142-5p. 6m control hippocampus expresses low level of miR142-5p. s.o (stratum oriens), s.p (stratum pyramidale), s.r (stratum radiatum). Experiments were conducted with coronal brain sections prepared from 3 Tau animals with 3 littermate controls.

**Supplementary Fig 5:** The multi-dimensional scaling (MDS) plot shows differences among tdTomato control and miR142-OE cortex samples in 1m wildtype mice.

**Supplementary Table 1:** Genotype information for hippocampi used for deep sequencing.

**Supplementary Table 2:** List of differentially regulated miRs in 2m Tau hippocampi by miRNA sequencing.

**Supplementary Table 3:** List of differentially regulated miRs in 6m Tau hippocampi by miRNA sequencing.

**Supplementary Table 4:** List of differentially regulated genes in 2m Tau hippocampi by mRNA sequencing.

**Supplementary Table 5:** Canonical pathway, Transcriptomic network, and Diseases and Biofunction analysis of differentially regulated genes in 2m Tau hippocampi.

**Supplementary Table 6:** Overlap of miR predicted gene targets with mRNA expression in 2M Tau mice.

**Supplementary Table 7:** Canonical pathway, Transcriptomic network, and Diseases and Biofunctions analysis on miR-regulated gene targets in the hippocampus tissue of 2-month old rTG4510 mice

**Supplementary Table 8:** List of differentially regulated genes between tdtomato (ctrl) or miR142-OE cortex by RNA deep sequencing.

**Supplementary Table 9:** Transcriptomic network analysis of differentially regulated gene transcripts induced by miR142-OE in wildtype cortex.

**Supplementary Table 10:** Canonical pathway, and Diseases and Biofunctions analysis of differentially regulated gene transcripts induced by miR142-OE in wildtype cortex.
